# Supplementary material
Source: publisher figshare collection journal article supplement (https://gsapubs.figshare.com/ndownloader/files/36537177)
Supplement: Supplementary file 1 [file 36537177]

## Sheet: Sheet1
Supplemental Table S1 U-Pb dating results for zircons from the granitoids along the Kanggur-Huangshan Shear Zone
Spot	Th/U	207Pb/206Pb		207Pb/235U		206Pb/238U		207Pb/206Pb		207Pb/235U		206Pb/238U
		ratio	1σ	ratio	1σ	ratio	1σ	Age (Ma)	1σ	Age (Ma)	1σ	Age (Ma)	1σ
Two-mica granite (Sample 18KH-68)
18KH-68-01	1.34314	0.05112	0.00205	0.29064	0.0117	0.04124	0.00072	246	90	259	9	261	4
18KH-68-02	1.05627	0.05193	0.00204	0.29754	0.01163	0.04156	0.00071	282	87	265	9	263	4
18KH-68-03	1.05199	0.05091	0.00213	0.29215	0.01217	0.04162	0.00072	237	94	260	10	263	4
18KH-68-04	1.7229	0.05191	0.00191	0.2827	0.01041	0.0395	0.00065	282	82	253	8	250	4
18KH-68-05	1.10938	0.05214	0.00242	0.30075	0.01385	0.04183	0.00076	292	103	267	11	264	5
18KH-68-06	1.04794	0.0509	0.00211	0.30008	0.01243	0.04276	0.00078	236	93	267	10	270	5
18KH-68-07	1.1482	0.05194	0.00309	0.28793	0.01687	0.04021	0.0009	283	131	257	13	254	6
18KH-68-08	1.14085	0.05236	0.00123	0.30665	0.00763	0.04248	0.00066	301	53	272	6	268	4
18KH-68-09	0.966698	0.05206	0.00322	0.29145	0.01751	0.04059	0.00087	288	135	260	14	257	5
18KH-68-10	1.49232	0.05216	0.00377	0.2943	0.02069	0.04092	0.00096	293	157	262	16	259	6
18KH-68-11	1.33437	0.05125	0.00144	0.29086	0.00838	0.04116	0.00064	252	63	259	7	260	4
18KH-68-12	0.904945	0.05132	0.00345	0.28873	0.01903	0.04081	0.00089	255	147	258	15	258	6
18KH-68-13	1.25064	0.05195	0.00204	0.28875	0.01132	0.04032	0.0007	283	87	258	9	255	4
18KH-68-14	1.17074	0.05128	0.00185	0.29579	0.01071	0.04184	0.0007	254	81	263	8	264	4
18KH-68-15	0.84508	0.05137	0.00389	0.30128	0.02226	0.04255	0.00109	258	165	267	17	269	7
18KH-68-16	0.712328	0.05227	0.00181	0.30506	0.01068	0.04233	0.00073	297	77	270	8	267	4
18KH-68-17	1.26391	0.05138	0.00232	0.3002	0.01352	0.04239	0.00082	258	100	267	11	268	5
18KH-68-18	1.43468	0.05145	0.00135	0.29085	0.00796	0.04101	0.00065	261	59	259	6	259	4
18KH-68-19	0.821002	0.05101	0.00194	0.29856	0.01142	0.04246	0.00076	241	85	265	9	268	5
18KH-68-20	0.885041	0.05199	0.004	0.30107	0.02265	0.04201	0.00107	285	167	267	18	265	7
18KH-68-21	1.09895	0.05127	0.00159	0.28624	0.00911	0.0405	0.00065	253	70	256	7	256	4
18KH-68-22	0.865363	0.05178	0.00165	0.29752	0.00962	0.04168	0.00068	276	71	265	8	263	4
18KH-68-23	0.701065	0.05148	0.0013	0.29035	0.00769	0.04092	0.00064	262	57	259	6	259	4
18KH-68-24	0.930148	0.05124	0.00181	0.28566	0.0102	0.04044	0.0007	252	79	255	8	256	4
18KH-68-25	1.20098	0.05136	0.00241	0.29137	0.01363	0.04116	0.00078	257	104	260	11	260	5
18KH-68-26	1.23261	0.05168	0.0029	0.3012	0.01659	0.04228	0.00087	271	124	267	13	267	5
18KH-68-27	0.920866	0.05127	0.0018	0.28593	0.01015	0.04046	0.0007	253	79	255	8	256	4
18KH-68-28	1.29748	0.0521	0.00244	0.28707	0.01324	0.03996	0.00075	290	103	256	10	253	5
Gneissic biotite granite (Sample 18KH-75)
18KH-75-01	0.449723	0.05187	0.00225	0.29435	0.01262	0.04118	0.00074	280	96	262	10	260	5
18KH-75-02	0.428019	0.05157	0.0017	0.28745	0.00963	0.04044	0.00067	267	74	257	8	256	4
18KH-75-03	0.665063	0.05137	0.00181	0.28335	0.01008	0.04003	0.00069	257	79	253	8	253	4
18KH-75-04	0.61394	0.05143	0.00144	0.29291	0.00842	0.04132	0.00064	260	63	261	7	261	4
18KH-75-05	0.671848	0.0513	0.00121	0.30221	0.00747	0.04274	0.00064	254	53	268	6	270	4
18KH-75-06	0.777875	0.05075	0.00101	0.2875	0.0062	0.0411	0.0006	229	46	257	5	260	4
18KH-75-07	0.324611	0.05169	0.00195	0.30112	0.01134	0.04227	0.0007	272	84	267	9	267	4
18KH-75-08	0.277519	0.05114	0.00085	0.29576	0.0056	0.04195	0.00061	247	38	263	4	265	4
18KH-75-09	0.663735	0.0517	0.00234	0.28937	0.01291	0.04061	0.00074	272	100	258	10	257	5
18KH-75-10	0.749388	0.05168	0.00197	0.29632	0.01128	0.0416	0.00071	271	85	264	9	263	4
18KH-75-11	0.424806	0.0526	0.0023	0.30204	0.01314	0.04166	0.00079	311	97	268	10	263	5
18KH-75-12	0.76305	0.05164	0.00158	0.29568	0.00915	0.04154	0.00065	270	69	263	7	262	4
18KH-75-13	0.729165	0.05154	0.00125	0.29968	0.00764	0.04219	0.00063	265	55	266	6	266	4
18KH-75-14	0.726108	0.05248	0.00103	0.29982	0.00636	0.04145	0.00061	306	44	266	5	262	4
18KH-75-15	0.392277	0.05194	0.00175	0.3035	0.01039	0.0424	0.00073	283	75	269	8	268	4
18KH-75-16	0.875621	0.05097	0.00126	0.29025	0.00745	0.04131	0.00063	240	56	259	6	261	4
18KH-75-17	0.622783	0.05093	0.00136	0.2868	0.00793	0.04085	0.00062	238	61	256	6	258	4
18KH-75-18	0.320096	0.05196	0.00158	0.30045	0.00926	0.04195	0.00067	284	68	267	7	265	4
18KH-75-19	0.800508	0.051	0.00148	0.2938	0.00873	0.04179	0.00066	241	65	262	7	264	4
18KH-75-20	0.58006	0.05205	0.00244	0.28997	0.01342	0.04041	0.00077	288	104	259	11	255	5
18KH-75-21	0.161423	0.05132	0.00081	0.29645	0.00541	0.04191	0.00061	255	36	264	4	265	4
18KH-75-22	0.670327	0.05197	0.00175	0.2904	0.00985	0.04054	0.00067	284	75	259	8	256	4
18KH-75-23	0.463171	0.05192	0.00103	0.29279	0.00628	0.04091	0.0006	282	45	261	5	259	4
18KH-75-24	0.382739	0.05163	0.00128	0.30356	0.00777	0.04265	0.00063	269	56	269	6	269	4
18KH-75-25	0.454699	0.05213	0.00177	0.30133	0.01033	0.04194	0.0007	291	76	267	8	265	4
18KH-75-26	0.643284	0.0526	0.00114	0.29672	0.00684	0.04092	0.00061	312	49	264	5	259	4
18KH-75-27	0.556271	0.05161	0.00107	0.30066	0.0067	0.04226	0.00062	268	47	267	5	267	4
18KH-75-28	0.700951	0.05124	0.00127	0.29158	0.00745	0.04129	0.00061	251	56	260	6	261	4
18KH-75-29	0.0850105	0.0508	0.00076	0.29221	0.00509	0.04174	0.0006	232	34	260	4	264	4
18KH-75-30	0.652851	0.05229	0.0014	0.30187	0.00834	0.04188	0.00065	298	60	268	7	265	4
18KH-75-31	0.560864	0.05115	0.00116	0.28572	0.00686	0.04053	0.00061	248	52	255	5	256	4
18KH-75-32	0.492448	0.05221	0.00268	0.29547	0.01501	0.04105	0.00077	295	113	263	12	259	5
18KH-75-33	0.246851	0.05049	0.00102	0.28491	0.00622	0.04094	0.0006	218	46	255	5	259	4
18KH-75-34	0.572163	0.05066	0.00092	0.29352	0.00591	0.04204	0.00061	225	42	261	5	266	4
18KH-75-35	0.494268	0.05188	0.00144	0.28759	0.00823	0.04022	0.00065	280	62	257	6	254	4
Two-mica granite (Sample 18KH-83)
18KH-83-01	0.609764	0.05248	0.00149	0.29894	0.00869	0.04132	0.00063	306.6	63.47	265.6	6.8	261	3.9
18KH-83-02	0.713035	0.05189	0.004	0.2874	0.02157	0.04017	0.00101	280.8	167.01	256.5	17.01	253.9	6.29
18KH-83-03	0.657549	0.0515	0.00324	0.30861	0.019	0.04347	0.00093	263.1	138.18	273.1	14.75	274.3	5.77
18KH-83-04	0.510639	0.05803	0.0012	0.32964	0.00724	0.04121	0.00059	530.3	45.14	289.3	5.53	260.3	3.66
18KH-83-05	0.500782	0.11227	0.00185	0.67613	0.01239	0.04369	0.00063	1836.5	29.6	524.4	7.51	275.7	3.89
18KH-83-06	0.994708	0.05205	0.00349	0.31032	0.0203	0.04324	0.00099	287.7	146.28	274.4	15.73	272.9	6.09
18KH-83-07	0.77189	0.07921	0.00137	0.45538	0.00877	0.0417	0.00061	1177.5	33.83	381	6.12	263.4	3.77
18KH-83-08	0.635093	0.05111	0.00401	0.30036	0.02289	0.04263	0.00108	245.9	171.15	266.7	17.88	269.1	6.65
18KH-83-09	0.487824	0.05172	0.00145	0.30581	0.00873	0.0429	0.00066	272.9	62.85	270.9	6.79	270.8	4.06
18KH-83-10	0.730088	0.08681	0.00223	0.51673	0.01332	0.04318	0.00065	1356.3	48.71	423	8.92	272.5	4.02
18KH-83-11	0.489359	0.05219	0.00142	0.30024	0.00841	0.04173	0.00065	293.6	60.8	266.6	6.56	263.6	4.03
18KH-83-12	0.562066	0.10264	0.0018	0.62279	0.012	0.04401	0.00064	1672.4	32.08	491.6	7.51	277.7	3.97
18KH-83-13	0.619219	0.06732	0.00236	0.38756	0.01336	0.04176	0.00069	847.7	71.26	332.6	9.78	263.7	4.24
18KH-83-14	0.647704	0.10306	0.00203	0.59866	0.01257	0.04213	0.00063	1680	35.88	476.4	7.98	266	3.91
18KH-83-15	0.658339	0.05151	0.00338	0.29154	0.01858	0.04106	0.00089	263.6	144.18	259.8	14.61	259.4	5.52
18KH-83-16	0.643187	0.0513	0.00137	0.28752	0.00786	0.04066	0.00061	254.2	60.05	256.6	6.2	256.9	3.77
18KH-83-17	0.447676	0.06361	0.00222	0.36174	0.01244	0.04125	0.00067	728.7	72.14	313.5	9.28	260.6	4.13
18KH-83-18	0.244918	0.0637	0.00111	0.37418	0.00734	0.04261	0.00063	731.7	36.5	322.7	5.42	269	3.89
18KH-83-19	0.925377	0.05988	0.00206	0.34903	0.01189	0.04228	0.00068	599.1	72.92	304	8.95	267	4.21
18KH-83-20	1.02431	0.05214	0.00163	0.29057	0.00914	0.04042	0.00063	291.6	69.76	259	7.19	255.4	3.88
Mylonitized granitic dyke (Sample 20KH-15)
20KH-15-01	0.513395	0.05133	0.00185	0.28872	0.01022	0.04079	0.00062	256	81	258	8	258	4
20KH-15-02	0.915211	0.05134	0.00332	0.27908	0.01754	0.03944	0.00085	256	142	250	14	249	5
20KH-15-03	0.765548	0.05156	0.00156	0.30052	0.00905	0.04227	0.00061	266	68	267	7	267	4
20KH-15-04	1.00864	0.05133	0.00193	0.28832	0.01066	0.04073	0.00063	256	84	257	8	257	4
20KH-15-05	0.731154	0.0515	0.00196	0.29773	0.01113	0.04193	0.00065	263	85	265	9	265	4
20KH-15-06	0.84974	0.05126	0.00234	0.28036	0.01263	0.03967	0.00065	252	102	251	10	251	4
20KH-15-07	1.00299	0.05146	0.00279	0.2841	0.0152	0.04004	0.00068	261	120	254	12	253	4
20KH-15-08	0.848567	0.05145	0.00209	0.29214	0.01168	0.04119	0.00068	261	90	260	9	260	4
20KH-15-09	0.652822	0.05114	0.00443	0.28427	0.02386	0.04033	0.0011	247	188	254	19	255	7
20KH-15-10	1.19019	0.05147	0.00379	0.29162	0.02083	0.0411	0.00098	262	160	260	16	260	6
20KH-15-11	0.802761	0.05244	0.00172	0.28264	0.00922	0.03909	0.00059	305	73	253	7	247	4
20KH-15-12	0.881593	0.05115	0.00388	0.28752	0.02116	0.0408	0.001	248	166	257	17	258	6
20KH-15-13	1.16228	0.05182	0.0033	0.28543	0.0176	0.03995	0.00083	278	139	255	14	253	5
20KH-15-14	0.55579	0.05146	0.00254	0.29539	0.0142	0.04164	0.00075	262	109	263	11	263	5
20KH-15-15	0.757195	0.05137	0.00202	0.28998	0.01116	0.04093	0.00064	258	88	259	9	259	4
20KH-15-16	0.983982	0.05145	0.0025	0.29829	0.01417	0.04206	0.00075	261	108	265	11	266	5
20KH-15-17	1.17764	0.05119	0.00283	0.27804	0.01492	0.0394	0.00075	250	122	249	12	249	5
20KH-15-18	0.542094	0.05181	0.00162	0.28666	0.00885	0.04013	0.00058	277	70	256	7	254	4
20KH-15-19	0.669699	0.05133	0.0022	0.29036	0.0122	0.04103	0.00069	256	96	259	10	259	4
Granodiorite (Sample 19KH-91)
19KH-91-01	0.524217	0.0524376	0.00169812	0.311213	0.0101252	0.0431423	0.000616318	305.615	74.0675	275.121	7.84302	272.281	3.81156
19KH-91-02	0.599809	0.0535286	0.00166769	0.327405	0.0113355	0.0439284	0.000715826	350.055	70.365	287.583	8.67316	277.137	4.42286
19KH-91-03	0.598709	0.0519997	0.00187359	0.324083	0.0120911	0.0450846	0.000774397	287.1	76.8425	285.039	9.27417	284.273	4.77919
19KH-91-04	0.837815	0.0486951	0.00144025	0.291893	0.00894977	0.0433172	0.000670054	131.57	74.99	260.048	7.03643	273.362	4.14274
19KH-91-05	0.533355	0.0497316	0.00149234	0.305246	0.00931468	0.0443893	0.000632217	188.97	70.3575	270.489	7.24846	279.983	3.90524
19KH-91-06	0.633101	0.0525705	0.00156799	0.323561	0.0104569	0.0442439	0.000668176	309.32	66.66	284.638	8.02444	279.085	4.12759
19KH-91-07	0.549779	0.0510702	0.00171179	0.319752	0.0115401	0.0452127	0.000811853	242.66	77.765	281.712	8.88071	285.063	5.00952
19KH-91-08	0.698658	0.0509081	0.00144727	0.320814	0.0103047	0.045209	0.000768085	235.25	66.655	282.528	7.9241	285.04	4.73973
19KH-91-09	0.73951	0.0492696	0.0015293	0.302705	0.0100436	0.0441303	0.000682652	161.195	72.21	268.511	7.83051	278.384	4.21734
19KH-91-10	0.61461	0.0496815	0.00154848	0.296274	0.00894827	0.0432359	0.000612798	188.97	72.21	263.486	7.01155	272.86	3.7895
19KH-91-11	0.509885	0.0525387	0.00190981	0.31609	0.0115375	0.043586	0.000646258	309.32	78.695	278.891	8.90341	275.022	3.99481
19KH-91-12	0.573866	0.050734	0.0017504	0.301732	0.00997976	0.0433222	0.000603917	227.845	79.6175	267.752	7.78659	273.393	3.73437
19KH-91-13	0.518398	0.0504294	0.00180082	0.313057	0.01177	0.0449564	0.000746302	213.035	81.4675	276.548	9.10367	283.482	4.60654
19KH-91-14	0.521541	0.052873	0.00174381	0.335462	0.0117376	0.0458665	0.000744021	324.13	71.29	293.727	8.9266	289.094	4.58858
19KH-91-15	0.547138	0.0491844	0.00150527	0.297046	0.00967188	0.0437163	0.000659804	166.75	74.9875	264.09	7.57369	275.828	4.07794
19KH-91-16	0.471565	0.0553888	0.00213536	0.339552	0.012843	0.0449799	0.000731251	427.825	91.6575	296.832	9.73714	283.627	4.51364
19KH-91-17	0.596826	0.0518433	0.00193192	0.308304	0.011823	0.0431014	0.000592364	279.69	85.1725	272.865	9.17781	272.028	3.66378
19KH-91-18	0.683511	0.0524579	0.00165095	0.317353	0.0106904	0.0438394	0.000668761	305.615	72.215	279.864	8.2421	276.587	4.13275
19KH-91-19	0.822178	0.0545927	0.00196039	0.311464	0.0108887	0.0417519	0.000630157	394.495	76.845	275.315	8.43253	263.683	3.90204
19KH-91-20	0.517111	0.0520138	0.00176403	0.306675	0.0100993	0.0428943	0.000617223	287.1	77.7675	271.6	7.85008	270.748	3.81802
19KH-91-21	0.807529	0.0542818	0.0015187	0.322567	0.00972069	0.0428365	0.000626698	383.385	61.105	283.876	7.46542	270.391	3.87676
19KH-91-22	0.568343	0.051424	0.00166909	0.304272	0.010045	0.0428665	0.000649524	261.175	74.0625	269.731	7.82221	270.577	4.01765
19KH-91-23	0.507767	0.0542423	0.00183676	0.331719	0.0115846	0.0441554	0.000712989	388.94	75.92	290.877	8.83501	278.539	4.40443
Biotite monzogranite (Sample 19KH-109)
19KH-109-01	0.541431	0.0495601	0.00156711	0.305574	0.00954789	0.0447922	0.000695543	176.01	78.69	270.745	7.42796	282.469	4.29424
19KH-109-02	0.56287	0.0519487	0.00148897	0.319613	0.0101586	0.0443854	0.000717887	283.395	64.805	281.605	7.81895	279.959	4.4337
19KH-109-03	0.484147	0.0494209	0.00132733	0.29672	0.0079772	0.0436732	0.000664261	168.6	61.1	263.835	6.24904	275.561	4.10561
19KH-109-04	0.512899	0.0526342	0.00183595	0.318494	0.0108479	0.0442445	0.00067849	322.28	79.62	280.743	8.3562	279.089	4.19122
19KH-109-05	0.476265	0.0524169	0.00176588	0.324342	0.011086	0.0448735	0.000627704	301.91	77.77	285.237	8.50195	282.971	3.87567
19KH-109-06	0.518583	0.0515517	0.00204353	0.311406	0.0133175	0.0438428	0.000746898	264.88	90.7275	275.27	10.3131	276.609	4.615
19KH-109-07	0.513797	0.0538364	0.00134507	0.325018	0.00847998	0.0436833	0.000580259	364.87	57.4025	285.756	6.50125	275.624	3.58712
19KH-109-08	0.42789	0.0537745	0.00185171	0.332463	0.0120832	0.0446539	0.000631495	361.165	77.77	291.444	9.20994	281.616	3.89983
19KH-109-09	0.526395	0.05212	0.00151623	0.330399	0.0102442	0.0460249	0.00075543	300.06	66.66	289.871	7.82104	290.071	4.65818
19KH-109-10	0.553699	0.0508092	0.00176295	0.304666	0.01089	0.0435038	0.00062381	231.55	79.6175	270.038	8.47734	274.514	3.85654
19KH-109-11	0.531686	0.0519451	0.00115251	0.332136	0.00848778	0.0461265	0.000671417	283.395	49.995	291.195	6.4726	290.696	4.14036
19KH-109-12	0.510685	0.0507967	0.00121547	0.3034	0.00771637	0.0432841	0.00064069	231.55	55.545	269.052	6.01404	273.157	3.96155
19KH-109-13	0.515793	0.0511212	0.00161443	0.303107	0.0103081	0.0428709	0.000671451	255.62	72.21	268.824	8.03417	270.603	4.15309
19KH-109-14	0.544114	0.0529192	0.00145226	0.326039	0.009976	0.0443445	0.000667404	324.13	62.9575	286.537	7.64138	279.706	4.12245
19KH-109-15	0.410847	0.0524949	0.00132558	0.335358	0.00945791	0.0459947	0.000655664	305.615	54.625	293.648	7.1944	289.884	4.04385
19KH-109-16	0.403664	0.0521828	0.00141006	0.323582	0.00950202	0.0449512	0.000737627	294.505	61.105	284.654	7.29202	283.45	4.55307
19KH-109-17	0.668504	0.0539973	0.00203051	0.325104	0.0121555	0.0438598	0.000742067	372.275	85.1775	285.821	9.31638	276.713	4.58511
19KH-109-18	0.643717	0.0523633	0.00181073	0.312032	0.0113709	0.0428913	0.000638589	301.91	84.25	275.755	8.80194	270.729	3.95001
19KH-109-19	0.683815	0.053006	0.00197127	0.320802	0.0131279	0.0434613	0.000693612	327.835	85.175	282.519	10.0941	274.252	4.28764
K-feldspar granite (Sample 19KH-114)
19KH-114-01	0.506855	0.0522909	0.00138452	0.317229	0.00912598	0.0439534	0.000644712	298.21	65.735	279.769	7.03731	277.292	3.98391
19KH-114-02	0.49703	0.0517755	0.00166857	0.311527	0.00965097	0.044336	0.000717995	275.99	74.06	275.364	7.47412	279.654	4.43457
19KH-114-03	0.566666	0.05293	0.00143328	0.324744	0.0100803	0.0440625	0.000606207	324.13	61.105	285.546	7.72873	277.965	3.74595
19KH-114-04	0.513622	0.0495133	0.00169206	0.308858	0.0113921	0.0450664	0.000662354	172.305	74.9875	273.295	8.83967	284.161	4.08856
19KH-114-05	0.456461	0.0528321	0.00146442	0.323287	0.00954321	0.0442201	0.000602155	320.43	62.9575	284.428	7.32524	278.938	3.72041
19KH-114-06	0.472219	0.0532572	0.00172716	0.324816	0.0107267	0.0442661	0.000631929	338.945	74.065	285.6	8.22357	279.222	3.90391
19KH-114-07	0.460556	0.0546574	0.0018956	0.333837	0.0112508	0.0446801	0.000696306	398.2	79.6225	292.491	8.56701	281.777	4.29939
19KH-114-08	0.801864	0.0536956	0.0015884	0.317153	0.0092636	0.0428811	0.000614211	366.72	66.66	279.71	7.14377	270.667	3.79947
19KH-114-09	0.481235	0.0528416	0.00157013	0.315114	0.00941903	0.043196	0.000640132	320.43	66.66	278.137	7.27477	272.613	3.95842
19KH-114-10	0.832553	0.0507614	0.00176697	0.30503	0.0107799	0.0435237	0.000708008	231.55	81.47	270.322	8.38937	274.638	4.37626
19KH-114-11	0.447081	0.0535055	0.00142692	0.327114	0.00922317	0.0439902	0.000564292	350.055	61.105	287.361	7.05941	277.519	3.4876
19KH-114-12	0.389598	0.0531413	0.00135729	0.332508	0.00873774	0.0454065	0.000711746	344.5	57.4	291.479	6.66119	286.258	4.39165
19KH-114-13	0.563443	0.0519065	0.00140617	0.320089	0.00859239	0.0448473	0.000671299	279.69	62.955	281.971	6.61185	282.809	4.14454
19KH-114-14	0.512872	0.0543536	0.0020556	0.334441	0.0126907	0.0447641	0.000708226	387.09	89.805	292.95	9.65851	282.296	4.37256
19KH-114-15	0.713979	0.0522338	0.00150695	0.317887	0.00959559	0.0438775	0.000669572	294.505	66.66	280.276	7.3955	276.823	4.13761
19KH-114-16	0.690757	0.0538607	0.00178944	0.324166	0.0106513	0.0437182	0.000684895	364.87	75.9175	285.102	8.16979	275.839	4.2328
19KH-114-17	0.518562	0.050849	0.00198573	0.310665	0.012344	0.0444639	0.000728617	235.25	88.875	274.696	9.56482	280.443	4.49956
19KH-114-18	0.524934	0.0528314	0.00141631	0.319538	0.00904506	0.0436095	0.000621852	320.43	63.8825	281.547	6.9628	275.168	3.84408
19KH-114-19	0.528868	0.0529036	0.00155136	0.317546	0.00990132	0.0431669	0.000617947	324.13	66.66	280.013	7.63295	272.433	3.82153
19KH-114-20	0.577473	0.0512703	0.00164842	0.31209	0.0100094	0.0441509	0.000622139	253.77	74.06	275.8	7.74821	278.511	3.84393
19KH-114-21	0.625886	0.0508353	0.00127247	0.300489	0.00819222	0.0425246	0.000586736	231.55	62.025	266.782	6.39881	268.463	3.63096
19KH-114-22	0.728518	0.0541701	0.00204585	0.323923	0.0125747	0.0432467	0.000692646	388.94	80.5475	284.916	9.64611	272.926	4.28252
19KH-114-23	0.581532	0.0507268	0.00150939	0.303849	0.00902419	0.0434258	0.000594957	227.845	63.8775	269.402	7.03005	274.033	3.67869
Biotite granite porphyry (Sample 18K-83)
18K-83-01	0.847149	0.05194	0.00116	0.31205	0.00746	0.04359	0.00067	283	50	276	6	275	4
18K-83-02	0.783027	0.05115	0.00114	0.31157	0.00728	0.04418	0.00065	248	50	275	6	279	4
18K-83-03	0.87345	0.05126	0.00107	0.29942	0.00669	0.04237	0.00062	253	47	266	5	268	4
18K-83-04	0.86321	0.05213	0.00115	0.30546	0.00716	0.0425	0.00064	291	50	271	6	268	4
18K-83-05	0.973419	0.05156	0.00132	0.30798	0.00828	0.04334	0.00069	266	58	273	6	274	4
18K-83-06	1.01566	0.05139	0.00104	0.29703	0.00651	0.04193	0.00063	259	46	264	5	265	4
18K-83-07	0.979342	0.05127	0.00137	0.30334	0.0083	0.04292	0.00065	253	60	269	6	271	4
18K-83-08	0.966439	0.05142	0.00101	0.30168	0.00642	0.04256	0.00063	260	45	268	5	269	4
18K-83-09	0.782544	0.05076	0.00102	0.30379	0.00665	0.04341	0.00065	230	46	269	5	274	4
18K-83-10	0.963089	0.05159	0.00179	0.29944	0.01052	0.0421	0.00073	267	78	266	8	266	4
18K-83-11	0.836378	0.05215	0.00124	0.30315	0.00756	0.04217	0.00063	292	54	269	6	266	4
18K-83-12	0.868761	0.05114	0.00106	0.30604	0.0067	0.04341	0.00062	247	47	271	5	274	4
18K-83-13	0.783257	0.05219	0.00103	0.3041	0.00656	0.04227	0.00063	294	44	270	5	267	4
18K-83-14	0.614484	0.05166	0.00097	0.31588	0.00658	0.04435	0.00066	271	43	279	5	280	4
18K-83-15	0.527445	0.05085	0.0018	0.31327	0.01132	0.04469	0.00083	234	80	277	9	282	5
18K-83-16	0.615242	0.05277	0.00159	0.30361	0.00934	0.04174	0.00069	319	67	269	7	264	4
18K-83-17	0.751691	0.0522	0.00106	0.30321	0.00666	0.04214	0.00062	294	46	269	5	266	4
18K-83-18	0.794006	0.05121	0.00167	0.31325	0.01035	0.04437	0.00074	250	73	277	8	280	5
18K-83-19	0.761431	0.05094	0.00171	0.31027	0.01063	0.04418	0.00078	238	76	274	8	279	5
18K-83-20	0.790723	0.05257	0.00188	0.30523	0.01081	0.04212	0.00068	310	79	271	8	266	4
18K-83-21	0.798549	0.05238	0.00126	0.30891	0.00777	0.04278	0.00065	302	54	273	6	270	4
18K-83-22	0.691033	0.05123	0.00108	0.31246	0.00699	0.04424	0.00065	251	48	276	5	279	4
18K-83-23	0.772343	0.05128	0.00167	0.30994	0.01015	0.04385	0.00071	253	73	274	8	277	4
18K-83-24	0.812479	0.05093	0.00123	0.30691	0.0078	0.04371	0.00068	238	55	272	6	276	4
18K-83-25	0.767279	0.05163	0.00125	0.30928	0.0078	0.04346	0.00066	269	55	274	6	274	4
18K-83-26	0.728504	0.0515	0.002	0.31264	0.01197	0.04404	0.00073	263	87	276	9	278	5
18K-83-27	0.732951	0.05132	0.00144	0.31509	0.00898	0.04454	0.00068	255	63	278	7	281	4
Coarse-grained biotite granite (Sample 18K-91)
18K-91-01	0.992366	0.05202	0.00108	0.3088	0.00702	0.04306	0.00067	286.2	46.79	273.2	5.45	271.7	4.15
18K-91-02	0.937808	0.05213	0.00247	0.31244	0.01467	0.04349	0.0009	291.1	104.68	276.1	11.35	274.4	5.54
18K-91-03	0.784064	0.05175	0.00093	0.31247	0.00628	0.0438	0.00065	274.2	40.45	276.1	4.86	276.3	4.03
18K-91-04	1.26878	0.05184	0.00234	0.31065	0.01381	0.04345	0.00079	278.2	100.04	274.7	10.7	274.2	4.89
18K-91-05	0.856518	0.05204	0.00216	0.30962	0.01274	0.04316	0.00076	287.3	92.21	273.9	9.88	272.4	4.72
18K-91-06	0.833388	0.05187	0.00127	0.30397	0.00787	0.04251	0.00068	279.7	55.02	269.5	6.13	268.3	4.19
18K-91-07	0.902638	0.05161	0.00121	0.30561	0.00748	0.04295	0.00064	268	52.72	270.8	5.82	271.1	3.95
18K-91-08	1.19129	0.05168	0.00115	0.30151	0.00709	0.04231	0.00063	271.3	50.07	267.6	5.53	267.1	3.88
18K-91-09	0.851237	0.05285	0.00114	0.31142	0.00722	0.04274	0.00065	322.3	48.31	275.3	5.59	269.8	4
18K-91-10	0.724175	0.05171	0.00096	0.31253	0.00639	0.04384	0.00065	272.6	41.78	276.1	4.95	276.6	3.98
18K-91-11	0.838044	0.05272	0.00097	0.31879	0.00647	0.04386	0.00065	316.6	41.05	281	4.98	276.7	3.98
18K-91-12	2.14109	0.05263	0.00108	0.31364	0.0071	0.04322	0.00068	312.9	45.87	277	5.49	272.8	4.21
18K-91-13	0.771179	0.05252	0.00111	0.3023	0.00689	0.04175	0.00063	308	47.54	268.2	5.37	263.7	3.87
18K-91-14	0.577348	0.0521	0.0017	0.32257	0.01079	0.0449	0.00081	290	72.72	283.9	8.29	283.1	4.98
18K-91-15	0.807901	0.05179	0.00097	0.30948	0.00638	0.04334	0.00064	276.4	42.12	273.8	4.95	273.5	3.97
18K-91-16	0.787454	0.05233	0.00095	0.3173	0.00637	0.04398	0.00065	300.1	40.65	279.8	4.91	277.4	3.99
18K-91-17	0.696474	0.05164	0.00105	0.3037	0.00668	0.04266	0.00064	269.4	45.86	269.3	5.2	269.3	3.94
18K-91-18	1.37127	0.05202	0.00106	0.31997	0.00711	0.04462	0.00068	286.3	46	281.9	5.47	281.4	4.18
18K-91-19	0.82119	0.05159	0.00105	0.30475	0.00675	0.04285	0.00064	267.4	46.2	270.1	5.25	270.5	3.97
18K-91-20	1.04152	0.0515	0.00148	0.31391	0.00908	0.04421	0.00066	263.4	64.51	277.2	7.01	278.9	4.1
18K-91-21	1.16202	0.05207	0.00259	0.3071	0.01497	0.04277	0.00083	288.3	109.75	271.9	11.63	270	5.13
18K-91-22	1.06526	0.05229	0.00108	0.32014	0.00715	0.04441	0.00067	298	46.36	282	5.5	280.1	4.13
18K-91-23	1.64243	0.05203	0.00191	0.31768	0.0118	0.04429	0.00082	286.7	81.55	280.1	9.09	279.4	5.07
Granitic dyke (Sample 20KH-05)
20KH-05-01	0.684334	0.05245	0.00377	0.27936	0.01949	0.03864	0.0009	305	155	250	15	244	6
20KH-05-02	1.26417	0.05046	0.00139	0.26689	0.00731	0.03835	0.00054	216	62	240	6	243	3
20KH-05-03	0.851817	0.05137	0.00212	0.2861	0.01154	0.04038	0.00065	257	92	256	9	255	4
20KH-05-04	1.07222	0.05091	0.00147	0.27336	0.00787	0.03893	0.00055	237	65	245	6	246	3
20KH-05-05	1.91345	0.05132	0.00136	0.27051	0.00719	0.03821	0.00053	255	60	243	6	242	3
20KH-05-06	0.797635	0.05155	0.00301	0.2874	0.01626	0.04043	0.00079	266	129	257	13	256	5
20KH-05-07	1.45992	0.05092	0.00235	0.26361	0.01189	0.03755	0.00065	237	103	238	10	238	4
20KH-05-08	1.45761	0.05016	0.00222	0.26506	0.01165	0.03831	0.00057	203	99	239	9	242	4
20KH-05-09	0.823062	0.05261	0.00196	0.27631	0.01013	0.03808	0.00059	312	83	248	8	241	4
20KH-05-10	0.891033	0.05152	0.0019	0.2812	0.01023	0.03958	0.00063	264	82	252	8	250	4
20KH-05-11	1.11533	0.05124	0.00153	0.26323	0.00782	0.03725	0.00053	252	67	237	6	236	3
20KH-05-12	0.956008	0.05277	0.00349	0.28255	0.01809	0.03883	0.00084	319	143	253	14	246	5
20KH-05-13	0.883311	0.05086	0.00376	0.27028	0.01936	0.03856	0.00091	234	162	243	15	244	6
20KH-05-14	1.16997	0.05075	0.00336	0.25984	0.01665	0.03713	0.0008	229	146	235	13	235	5
20KH-05-15	0.962963	0.05155	0.00402	0.28562	0.02206	0.04018	0.00073	265	169	255	17	254	5
20KH-05-16	0.84697	0.05139	0.00281	0.26835	0.0143	0.03787	0.00072	258	121	241	11	240	5
20KH-05-17	0.916466	0.05177	0.00139	0.2718	0.00731	0.03806	0.00052	275	61	244	6	241	3
20KH-05-18	0.895254	0.05234	0.00182	0.27582	0.00945	0.03821	0.00058	300	77	247	8	242	4
20KH-05-19	1.28106	0.05159	0.00195	0.27755	0.01035	0.039	0.00062	267	85	249	8	247	4
20KH-05-20	0.95229	0.05195	0.00222	0.26949	0.01128	0.0376	0.00062	283	95	242	9	238	4
20KH-05-21	0.873167	0.05158	0.00237	0.26151	0.0117	0.03675	0.00064	267	102	236	9	233	4
20KH-05-22	1.00186	0.05087	0.0022	0.26204	0.01106	0.03735	0.00061	235	97	236	9	236	4
20KH-05-23	1.5999	0.0519	0.00133	0.27324	0.00708	0.03817	0.00052	281	58	245	6	242	3
K-feldspar granite porphyry (Sample 19KH-122)
19KH-122-02	0.792251	0.0535705	0.0020771	0.276844	0.0102685	0.0379123	0.000597118	353.76	88.88	248.151	8.16756	239.879	3.71093
19KH-122-03	0.682438	0.0534621	0.00231655	0.271117	0.0115397	0.0369845	0.000556695	350.055	93.51	243.586	9.21952	234.114	3.463
19KH-122-04	0.663923	0.0496681	0.00260954	0.257006	0.0128028	0.0380489	0.000606701	188.97	122.205	232.252	10.3431	240.728	3.76993
19KH-122-05	0.690045	0.0524916	0.0027834	0.270413	0.0129359	0.0382227	0.000610482	305.615	122.205	243.024	10.3404	241.807	3.79278
19KH-122-06	0.67011	0.0504568	0.00206437	0.249381	0.010092	0.0363274	0.00059212	216.74	96.2825	226.074	8.20327	230.028	3.68534
19KH-122-07	0.65957	0.0510525	0.0027944	0.253783	0.0133102	0.0365401	0.000536349	242.66	121.28	229.644	10.7805	231.351	3.33798
19KH-122-08	0.818328	0.0513987	0.00231859	0.265201	0.0113634	0.0374584	0.000683987	257.47	108.318	238.85	9.12112	237.059	4.25199
19KH-122-09	0.862682	0.0483448	0.00195527	0.245743	0.0103061	0.0371835	0.000672948	116.755	96.2825	223.112	8.40167	235.351	4.18451
19KH-122-10	0.717085	0.0504502	0.0020398	0.257247	0.0100766	0.0374209	0.000563729	216.74	92.5775	232.446	8.13965	236.826	3.50528
19KH-122-11	0.750248	0.0497883	0.00215228	0.248993	0.0104262	0.0366417	0.000782227	183.415	101.837	225.757	8.47748	231.983	4.86593
19KH-122-12	0.618553	0.0546788	0.00223317	0.284819	0.0117455	0.0379549	0.000669975	398.2	90.7325	254.473	9.28398	240.144	4.16302
19KH-122-13	0.679986	0.0503692	0.00243266	0.264897	0.0128511	0.0383463	0.000640945	213.035	112.947	238.606	10.3173	242.574	3.98136
19KH-122-14	0.741939	0.050805	0.00195398	0.257904	0.0103891	0.0365983	0.000500199	231.55	88.875	232.976	8.38763	231.713	3.11316
19KH-122-15	0.860911	0.0518903	0.00260591	0.270306	0.013638	0.0377845	0.000732457	279.69	114.797	242.939	10.9024	239.086	4.55164
19KH-122-16	0.8376	0.0491517	0.00292464	0.26136	0.0148015	0.0385563	0.000833844	153.79	138.87	235.762	11.9161	243.878	5.17742
19KH-122-17	0.715854	0.0504834	0.00220278	0.260117	0.0113402	0.0372637	0.000593907	216.74	99.985	234.761	9.13916	235.85	3.69322
19KH-122-18	0.746232	0.0508654	0.00412492	0.260657	0.0202446	0.0371274	0.00079166	235.25	188.865	235.196	16.3066	235.003	4.92231
19KH-122-19	0.794146	0.0484632	0.00249627	0.254987	0.0133164	0.037884	0.000676277	120.46	118.495	230.619	10.7751	239.704	4.20243
19KH-122-20	0.733579	0.0513091	0.00252846	0.269444	0.0127682	0.038192	0.000653727	253.77	82.3975	242.249	10.2142	241.616	4.06126
19KH-122-21	0.727286	0.0504338	0.00230334	0.258643	0.0116144	0.0372325	0.000571753	216.74	105.54	233.573	9.37105	235.656	3.55573
19KH-122-22	0.605677	0.0493549	0.00230975	0.255141	0.0126826	0.0372831	0.000614327	164.9	141.647	230.744	10.2611	235.97	3.81999
19KH-122-24	0.587294	0.0543063	0.00185631	0.280819	0.00882032	0.0378032	0.00054415	383.385	75.9175	251.307	6.99449	239.201	3.38251
19KH-122-25	0.718289	0.0506579	0.00243587	0.257671	0.0123195	0.0368034	0.000560742	233.4	111.095	232.789	9.94745	232.988	3.48873
19KH-122-26	0.665839	0.0510351	0.00204081	0.26276	0.0104774	0.0375283	0.000591813	242.66	92.58	236.888	8.42642	237.494	3.67931
19KH-122-27	0.724315	0.052167	0.00207019	0.263606	0.010824	0.0366278	0.000579809	300.06	95.355	237.569	8.69924	231.896	3.60779
19KH-122-28	0.630123	0.0508359	0.00210308	0.257819	0.0103291	0.0370649	0.000532416	231.55	63.88	232.908	8.33977	234.614	3.31193
19KH-122-29	1.38645	0.0499714	0.00184912	0.262644	0.00949763	0.0384108	0.000513546	194.525	85.1725	236.795	7.63943	242.975	3.19077
19KH-122-30	0.651711	0.0541295	0.00172773	0.277097	0.00895447	0.0372077	0.000528057	375.98	76.845	248.352	7.12145	235.501	3.28442
